# Supplementary material for: Fabrication of porous carbon nanotube network
Source: Royal Society of Chemistry journal article supplement (doi:10.1039/b812868e), 2008-01-01
Supplement: b812868e.pdf [file b812868e.pdf]

Ref.: B812868E

## Supporting Information

### Fabrication of Porous Carbon Nanotube Network

Jun-We Su,<sup>a</sup> Shu-Juan Fu,<sup>a</sup> Shangjr Gwo<sup>b</sup> and Kuna-Jiuh Lin <sup>\*a</sup>

<sup>a</sup>: Department of Chemistry, Center of Nanoscience and Nanotechnology, National Chung Hsing University, Taichung 402, Taiwan (ROC)

<sup>b</sup>: Department of Physics, National Tsing Hua University, Hsinchu 300, Taiwan (ROC)

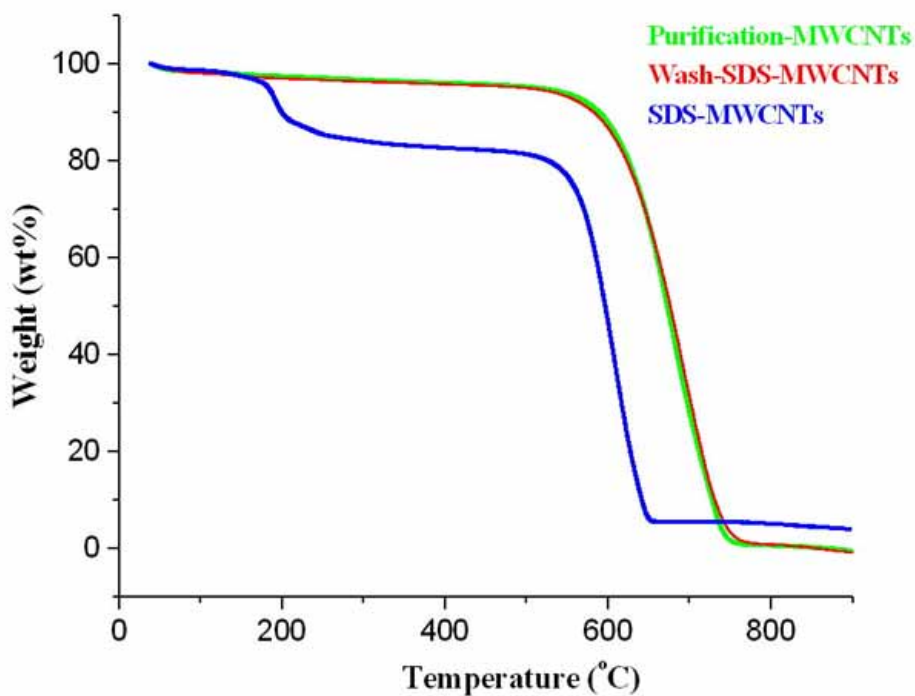

Fig. S2. TGA profile for MWCNTs

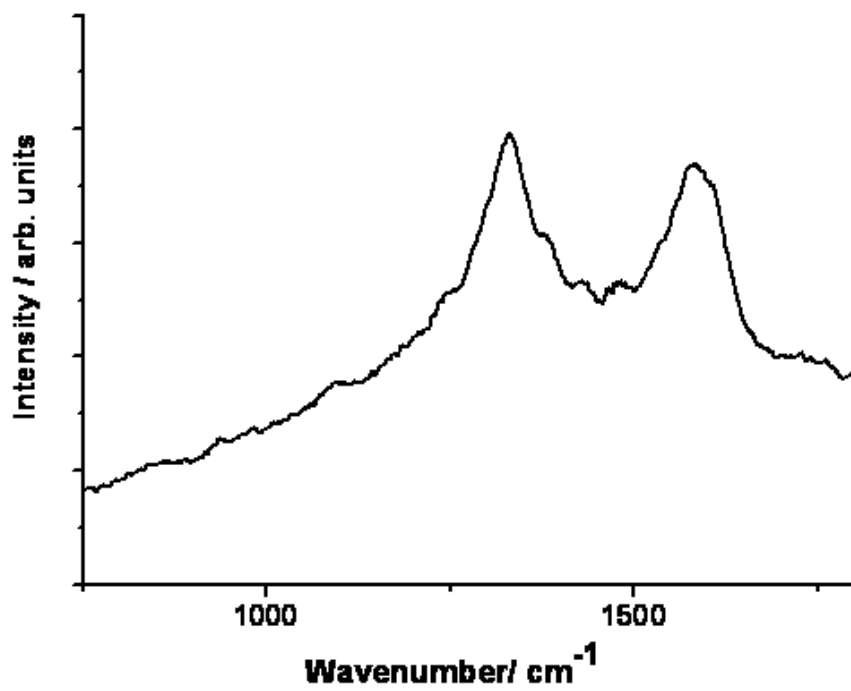

**Fig. S2** Raman spectra of thin film of MWCNTs on the PET
